# Supplementary material
Source: PubMed Central journal article supplement (PMC4072455)

## Appendix

### Supplementary Data

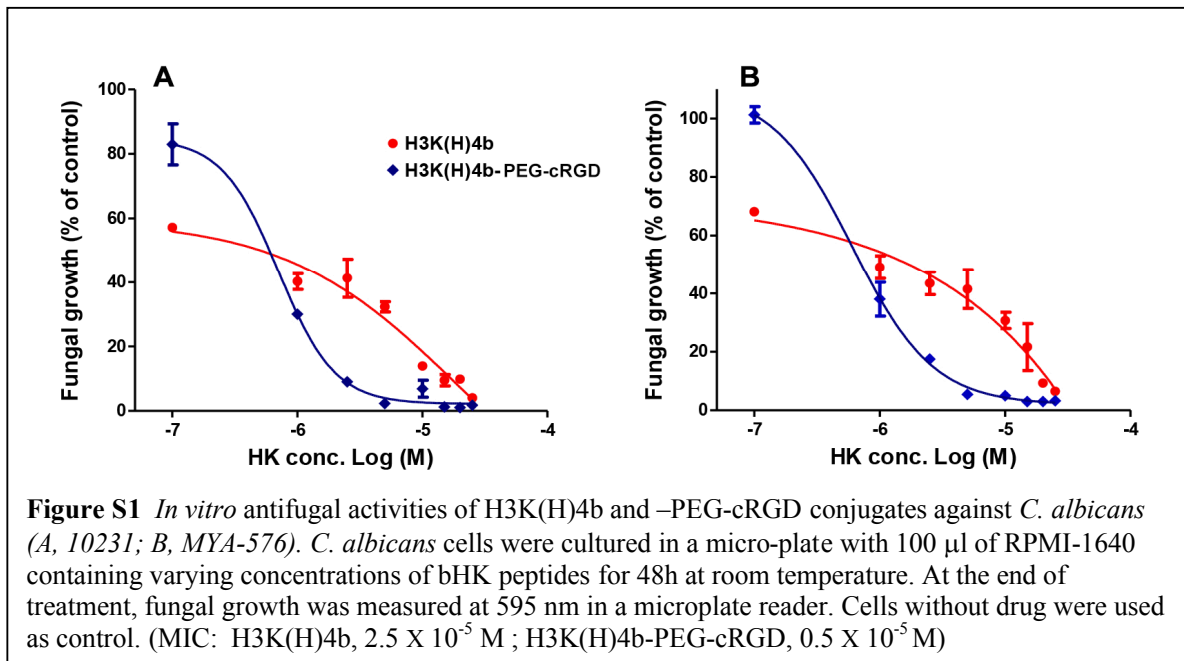

Supplement: NIHMS579945-supplement-supplement_1.pdf [file NIHMS579945-supplement-supplement_1.pdf]
